# Ageing affects DNA methylation drift and transcriptional cell-to-cell variability in muscle stem cells

**Authors:** Irene Hernando-Herraez<sup>1\*</sup>, Brendan Evano<sup>2,3,4\*</sup>, Thomas Stubbs<sup>1\*</sup>, Pierre-Henri Commere<sup>5</sup>, Stephen Clark<sup>1</sup>, Simon Andrews<sup>1</sup>, Shahragim Tajbakhsh<sup>2,3#</sup>, Wolf Reik<sup>1#</sup>

## **Affiliations:**

<sup>1</sup> Epigenetics Programme, Babraham Institute, Cambridge CB22 3AT, United Kingdom

<sup>2</sup> Stem Cells & Development, Department of Developmental & Stem Cell Biology, Institut Pasteur, 25 rue du Dr. Roux, 75015, Paris, France.

<sup>3</sup> CNRS UMR 3738, Institut Pasteur, Paris 75015, France.

<sup>4</sup> Current address: CNRS UMR 3664, Nuclear Dynamics, Institut Curie, Pavillon Pasteur, 26 rue d'Ulm 75005 Paris, France.

<sup>5</sup> Cytometry and Biomarkers, Center for Technological Resources and Research, Institut Pasteur, 28 rue du Dr. Roux, 75015, Paris, France.

\* Equal contributions.

# Equal contributions.

Correspondence to [Irene.Herraez@babraham.ac.uk](mailto:Irene.Herraez@babraham.ac.uk), [shahragim.tajbakhsh@pasteur.fr](mailto:shahragim.tajbakhsh@pasteur.fr) and [wolf.reik@babraham.ac.uk](mailto:wolf.reik@babraham.ac.uk)

19 **Abstract:**

20 Age-related tissue alterations have been associated with a decline in stem cell number and  
21 function<sup>1</sup>. Although increased cell-to-cell variability in transcription or epigenetic marks has  
22 been proposed to be a major hallmark of ageing<sup>2-5</sup>, little is known about the molecular diversity  
23 of stem cells during ageing. Here, by combined single-cell transcriptome and DNA methylome  
24 profiling in mouse muscle stem cells, we show a striking global increase of uncoordinated  
25 transcriptional heterogeneity together with context-dependent alterations of DNA methylation  
26 with age. Importantly, promoters with increased methylation heterogeneity are associated with  
27 increased transcriptional heterogeneity of the genes they drive. Notably, old cells that change  
28 the most with age reveal alterations in the transcription of genes regulating cell-niche  
29 interactions. These results indicate that epigenetic drift, by accumulation of stochastic DNA  
30 methylation changes in promoters, is a substantial driver of the degradation of coherent  
31 transcriptional networks with consequent stem cell functional decline during ageing.

32           Epigenetic alterations have been proposed to be a major cause of age-related decline in  
33 tissue function<sup>6</sup>. Changes in DNA methylation are well correlated with ageing and methylation  
34 of specific loci has been used as age biomarker in a large number of tissues<sup>6,7</sup>. However, age-  
35 related methylation changes are poorly correlated with transcriptional variation, presumably  
36 because the changes are generally small and may not occur homogeneously in all cells<sup>7</sup>, a  
37 phenomenon also known as epigenetic drift. Although epigenetic drift has long been  
38 hypothesised to be an important hallmark of ageing<sup>8</sup>, this proposal has been challenging to test  
39 because of technical constraints. However, powerful combined single cell methods<sup>9,10</sup> are now  
40 available, and epigenetic changes during ageing together with their functional consequences  
41 can now be read out in single cells<sup>11</sup>.

42           Degenerative changes in tissue-specific stem cells have been proposed to be a major  
43 cause of age-related decline in tissue function<sup>12</sup>. While several reports indicate a loss of clonal  
44 diversity during early life stages<sup>13-15</sup> little is known about how cell-to-cell variability at the  
45 molecular level is involved in stem cell ageing. Here, we performed parallel single-cell DNA  
46 methylation and transcriptome sequencing (scM&T-seq) on the same cell<sup>10</sup> to investigate how  
47 ageing affects transcriptional and epigenetic heterogeneity of tissue-specific stem cells, using  
48 mouse muscle stem cells as a model. Muscle satellite (stem) cells express the transcription  
49 factor *Pax7*<sup>16</sup> and are largely quiescent in adult muscles. They activate upon injury to  
50 differentiate and fuse to form new fibers, or self-renew to reconstitute the stem cell pool<sup>16</sup>. Age-  
51 associated muscle defects have been attributed to a decrease in stem cell number together with  
52 impaired regenerative potential<sup>17</sup>. In addition, clonal lineage-tracing of mouse satellite cells  
53 showed that population diversity is unaltered during homeostatic ageing<sup>18</sup>.

54           Satellite cells with high expression of *Pax7* were shown to be in a deep quiescent state<sup>19,20</sup>.  
55 To investigate the molecular effects of ageing in a defined population that is less poised to  
56 enter the cell cycle, we isolated single satellite cells by fluorescence-activated cell sorting

57 (FACS) from young (2 months) and old (24 months) *Tg:Pax7-nGFP* mice<sup>21</sup> and selected those  
58 with high levels of GFP, to which we applied scM&T-seq (Fig. 1A).

59 After quality control and filtering, a total of 377 transcriptomes were analysed. Young  
60 and old cells from different individuals clustered together, respectively, indicating no global  
61 differences with age and absence of sequencing-related batch effects (Fig. 1B). Furthermore,  
62 we did not observe significant differences in the levels of *Pax7*, the myogenic factors *Myod*  
63 and *Myf5* and the cell cycle inhibitor *Cdkn1b*, nor of senescent markers such as *Cdkn2a*,  
64 suggesting that some molecular signatures are conserved between the analysed cell populations  
65 (Fig. 1C). Nevertheless, 940 genes were differentially expressed between young and old  
66 individuals (SCDE, FDR  $P < 0.05$ , Table S1). *Spry1*, which is a key factor for maintaining  
67 quiescence<sup>22</sup>, and the cell cycle regulators *Ccnd1*, *Btg1* and *Gas1* were down-regulated, while  
68 ageing markers such as the chemokine genes *Ccl11* and *Ccl19* were up-regulated<sup>20</sup> (Fig. 1C).  
69 Furthermore, we uncovered genes not previously reported to change in expression with age,  
70 such as the early activation markers *Fosb* and *Egr1*<sup>23</sup> and the metalloproteinase *Mmp2* (Fig.  
71 1C).

72 To investigate if ageing affects transcriptional heterogeneity of the stem cell pool, we  
73 calculated pairwise correlation coefficients between cells within each individual (see Methods)  
74 and observed that old individuals showed consistently lower correlation (1.3 mean-fold  
75 decrease, Mann-Whitney-Wilcoxon test;  $P < 2.2e-16$ , Fig. 1D), indicating a remarkably lower  
76 degree of similarity between cells and no obvious population substructure. We also computed  
77 an expression-level normalised measure of gene expression heterogeneity (named distance to  
78 the median)<sup>24</sup>, which proved to be higher in old individuals (Mann-Whitney-Wilcoxon test;  $P$   
79  $< 2.2e-16$ , Fig. 1E) revealing a striking global increase of uncoordinated transcriptional  
80 variability with age. Strikingly, the proportion of cells expressing a given gene (frequency of  
81 gene expression) was reduced with age (Mann-Whitney-Wilcoxon test;  $P < 2.2e-16$ , Fig. 1F),

82 even in genes that did not significantly change mean expression levels (SCDE, FDR  $P > 0.05$ ,  
83 Fig. 1F). Importantly, we observed that this was independent of gene expression levels and not  
84 restricted to lowly expressed genes suggesting that this global feature is unrelated to technical  
85 effects (Fig. 1G).

86 Genes that displayed increased expression variability with age (expression frequency  
87 difference  $> 15\%$ ) include several collagen genes (*Col4a2*, *Col5a3*, *Col4a1*) and other  
88 extracellular matrix-related genes such as *Dag1*, *Sparc*, *Cdh15* or *Itgb1* (Fig. 2A). Interestingly,  
89 satellite cells without *Itgb1* ( $\beta$ 1-integrin) cannot maintain quiescence and its experimental  
90 activation improves ageing-related decline in muscle regeneration<sup>25</sup>. Similarly, reduction of N-  
91 cadherin and M-cadherin (*Cdh15*) leads to a break of quiescence of satellite cells<sup>26</sup>. Notably,  
92 none of the above-mentioned genes were shown to change in expression level during the  
93 isolation procedure of satellite cells<sup>27</sup>.

94 The observed increase in transcriptional variability with age could reflect the presence of  
95 cell subpopulations or be a purely stochastic process. Despite not observing clear substructure  
96 (Fig. 1B and Fig. 1D right), we further investigated the origin of this variability by ranking old  
97 cells based on their transcriptome-wide similarity to young cells, and performed correlation  
98 analyses to identify the genes driving this ranking. Gene ontology analysis indicated that old  
99 cells that differed the most from young cells were enriched in processes such as translation and  
100 peptide biosynthesis (Fig. 2B top), while old cells that were most similar to young ones were  
101 enriched in extracellular matrix-related functions (Fig. 2B bottom). For example, *Fos* and  
102 *Mmp2* were preferentially expressed in the most different old cells, while extracellular markers  
103 such as *Dag1*, *Itgb1*, *Cdh15* or *Bgn* were expressed in the most similar ones (Fig. 2C). These  
104 results indicate that cells that have accumulated more differences with age are likely to have  
105 impaired cell-niche interactions and are more prone to exit quiescence (Fig. 2D).

106 For the analysis of DNA methylation patterns, we limited potential biases due to uneven  
107 sequencing depth between cells or different number of cells per individual by randomly  
108 subsampling 1 million reads from each cell and 35 cells per individual (140 cells in total, 2  
109 million CpG sites on average per cell). Global mean DNA methylation levels were around  
110 50%, as previously reported for muscle stem cells<sup>28</sup> (Fig. S1C). As with the transcriptomes, we  
111 did not observe clear subpopulations in any of the methylome samples (Fig. S2). Overall, CpG  
112 islands, promoters and enhancers were hypomethylated; exons, myoblast enhancers (marked  
113 by H3K27ac) and shores (flanking region of the CpG islands) were around 30% methylated,  
114 while repeats and bodies of active genes (marked by H3K36me3) were highly methylated (Fig.  
115 3A). We found that DNA methylation levels increased slightly with age, as reported for human  
116 muscle stem cells<sup>22</sup>, mostly in repeat elements and H3K36me3 regions (Fig. 3B, 3C and 3D).

117 Identical average methylation levels for a given genomic region may reflect different  
118 scenarios, from uniform populations to completely random heterogeneous patterns (Fig. 3E).  
119 Since we did not observe substructure in our data (Fig. S2) and as stochastic epigenetic drift  
120 has been suggested to be a major hallmark of ageing<sup>8</sup>, we computed a score to measure levels  
121 of stochastic intrapopulation heterogeneity (Fig. S3, Methods). As expected, our initial  
122 measure of heterogeneity depended on average methylation levels (Fig. 3F). Hence, we  
123 developed an independent measure of heterogeneity by calculating the distance between the  
124 observed heterogeneity for each genomic region and a rolling median (Fig. 3F, Methods).  
125 Interestingly, this analysis showed that different genomic contexts displayed different levels of  
126 methylation heterogeneity between cells, for example CpG islands were more heterogeneous  
127 than enhancers (Fig. 3G).

128 Global levels of methylation heterogeneity were similar between ages (Fig. S4); we next  
129 computed localised Z-score comparisons between young and old to examine changes in  
130 specific genomic elements. Notably, methylation of LINE-1 elements became more

131 homogeneous with age whereas regions marked by H3K27me3 became more heterogeneous  
132 (Fig. 4A). Specifically, LINE-1 elements also experienced the highest increase in absolute  
133 DNA methylation levels, both of which may reflect a coordinated mechanism to prevent  
134 deleterious somatic retrotranspositions during ageing. Most of the H3K27me3 regions were  
135 associated with genes that are repressed but poised for rapid activation<sup>29</sup>. We hypothesize that  
136 this increase in methylation heterogeneity may contribute to an impaired transcriptional  
137 response upon activation.

138 Interestingly, we observed a negative correlation between changes in methylation levels  
139 and changes in methylation heterogeneity (Promoters: Pearson's coefficient= -0.35,  $P < 2.2e-$   
140 16, Fig. 4B). Regions becoming more homogeneous showed an increase in methylation,  
141 suggesting that *de novo* methylation enzymes (Dnmt3a,b) are recruited to specific sites and add  
142 methylation in a coordinated manner between cells. In contrast, regions becoming more  
143 heterogeneous showed a decrease in their methylation levels. Despite the low proliferative  
144 history of these cells, this pattern could reflect errors in DNA methylation maintenance during  
145 DNA replication, or an active demethylation mechanism via TET enzymes (Fig. S5).

146 Epigenetic changes may contribute to the age-associated pattern of transcriptional  
147 heterogeneity. To explore this possibility, we analysed the association between promoter DNA  
148 methylation and gene expression. We calculated a correlation coefficient for each cell and  
149 confirmed the expected negative correlation for methylation and transcription (Fig. 4C).  
150 Interestingly, old cells that were most transcriptionally different from young cells showed  
151 lower levels of correlation (Mann-Whitney-Wilcoxon test;  $P < 0.05$ , Fig. 4C). Furthermore, we  
152 calculated changes in transcriptional variability between young and old cells (see Methods)  
153 and observed that promoters with increased methylation heterogeneity tended to have increased  
154 transcriptional heterogeneity (Mann-Whitney-Wilcoxon test;  $P < 0.001$ ) (Fig. 4D). It appears  
155 therefore that deterioration of transcriptional coherence during ageing is associated with

156 increased promoter methylation heterogeneity and with decreased connectivity between the  
157 epigenome and the transcriptome.

158 In summary, we report transcriptional and epigenetic signatures associated with ageing  
159 in a deeply quiescent population of muscle stem cells. Previous studies have investigated  
160 transcriptional heterogeneity changes with age in mixed cell populations<sup>4</sup> which are affected  
161 by differences in cellular composition, such as an increase in senescent cells<sup>4</sup>. In contrast, our  
162 study is focused on a specific population of cells in which known stemness, activation and  
163 senescent markers were not affected by ageing. Even in this restricted population, we observe  
164 a global increase of uncoordinated transcriptional variability with age, indicating an intrinsic  
165 mechanism of cellular ageing. Interestingly, mouse muscle stem cells were shown to maintain  
166 clonal diversity during homeostatic ageing by lineage-tracing<sup>18</sup>, however, our study uncovers  
167 a dramatic underlying molecular heterogeneity in these stem cells that extends beyond  
168 maintenance of clonal homogeneity. We also observe that cells that have acquired more  
169 differences with age showed alterations in multiple extracellular matrix related genes  
170 potentially affecting cell-niche interactions.

171 Elevated transcriptional variability with age has been reported in several studies<sup>2-4</sup>,  
172 however the underlying causes remain largely unknown. The accumulation of somatic  
173 mutations only partially accounts for the increased cell-to-cell transcriptional variability<sup>4</sup>,  
174 suggesting that epigenetic mechanisms might be a contributing factor<sup>5</sup>. In this study, by  
175 applying for the first time a combined single cell method for DNA methylation and the  
176 transcriptome, we show that epigenetic drift, or the uncoordinated accumulation of methylation  
177 changes in promoters, contributes to the increased transcriptional variability with age (Fig. 4E).  
178 Due to the deep quiescent state of the homeostatic cells chosen for study, our data highlight the  
179 possibility that the observed epigenetic patterns could be independent of extensive cell  
180 proliferation. We propose that this variability is detrimental due to uncoordinated transcription,



181       thereby affecting the ability of stem cells to maintain quiescence or activate coherently upon  
182       injury. Future studies of different stem cell populations integrating multiple layers of molecular  
183       information will be highly informative for a more complete understanding of the underlying  
184       molecular mechanisms of ageing and age-related diseases.

185 **Methods**

186 Mice

187 Animals were handled according to national and European Community guidelines, and an  
188 ethics committee of the Institut Pasteur (CETEA) in France approved protocols. Young (2  
189 months-old) and old (24 months-old) *Tg:Pax7-nGFP<sup>21</sup>* mice were used in this study.

190

191 Isolation of satellite cells

192 Mice were sacrificed by cervical dislocation. *Tibialis anterior* muscles were dissected and  
193 placed into cold DMEM (ThermoFisher, 31966). Muscles were then chopped and put into a 15  
194 ml Falcon tube containing 10 ml of DMEM, 0.08% collagenase D (Sigma, 11 088 882 001),  
195 0.1% trypsin (ThermoFisher, 15090), 10  $\mu$ g/ml DNaseI (Sigma, 11284932) at 37°C under  
196 gentle agitation for 25 min. Digests were allowed to stand for 5 min at room temperature and  
197 the supernatants were collected on 5 ml of foetal bovine serum (FBS; Gibco) on ice. The  
198 digestion was repeated 3 times until complete digestion of the muscle. The supernatants were  
199 filtered through a 70- $\mu$ m cell strainer (Miltenyi, 130-098-462). Cells were spun for 15 min at  
200 515g at 4°C and the pellets were resuspended in 1 ml freezing medium (10% DMSO (Sigma,  
201 D2438) in foetal calf serum (FCS, Invitrogen)) for long term storage in liquid nitrogen.

202 Before isolation by FACS, samples were thawed in 50 ml of cold DMEM, spun for 15  
203 min at 515g at 4°C. Pellets were resuspended in 300  $\mu$ l of DMEM 2% FCS 1  $\mu$ g/mL propidium  
204 iodide (Calbiochem, 537060) and filtered through a 40- $\mu$ m cell strainer (BD Falcon, 352235).  
205 Viable cells were isolated based on size, granularity and GFP expression level (top 10%  
206 nGFP<sup>Hi</sup> cells, Fig. S6) using a MoFlo Astrios cell sorter (Beckmann Coulter).

207 Single cells were collected in 2.5  $\mu$ L cold RLT Plus buffer (Qiagen, 1053393) containing  
208 1U/ $\mu$ L RNase inhibitor (Ambion, AM2694) in 96 well-plates (LoBind Eppendorf,  
209 0030129504), flash-frozen on dry ice and stored at -80°C.

210

### 211 Library preparation and data alignment

212 We prepared scM&T-seq libraries<sup>10</sup> by isolating mRNA on magnetic beads and separating from  
213 the single-cell lysate as described<sup>30</sup> prior to reverse transcription and amplification using  
214 Smartseq2<sup>31</sup> but with 25 PCR cycles. We then processed the lysate containing genomic DNA  
215 according to the published single-cell bisulfite sequencing protocol<sup>32</sup>. Single-cell RNA-seq  
216 libraries were aligned using HiSat2 with options --sp 1000,1000 --no-mixed --no-discordant<sup>33</sup>.  
217 Single-cell bisulfite libraries were processed using Bismark<sup>34</sup> as described<sup>10</sup>. Mapped RNA-seq  
218 data were quantitated using the RNA-seq quantitation pipeline in Seqmonk software  
219 ([www.bioinformatics.babraham.ac.uk/projects/seqmonk/](http://www.bioinformatics.babraham.ac.uk/projects/seqmonk/)).

220

### 221 Quality control RNA-seq

222 Cells expressing fewer than 1,000 genes or less than  $10^5$  mapped reads allocated to nuclear  
223 genes were removed in quality control (Fig. S7). These cells were also verified to have less  
224 than 10% of mapped on mitochondrial genes. Out of the 768 cells that were captured across  
225 the experiment, 377 passed our quality and filtering criteria (Table S2).

226

### 227 Data analysis RNA-seq

228 Gene expression levels were estimated in terms of reads per million of mapped reads to the  
229 transcriptome. A score of variability per gene (named distance to the median) was calculated  
230 by fitting the squared coefficient of variation as a function of the mean normalized counts and  
231 then calculating the distance to a rolling average (window size=100) (Fig. S8)<sup>24</sup>. We included  
232 only genes with an average normalized read count of at least 10. The top 1000 most variable  
233 genes of the entire data set were used to perform principal component analyses (as log<sub>2</sub>-  
234 transformed and median-cantered values) (Fig. 1B, Table S3). Single cell differential

235 expression (SCDE) was used to calculate differential expression analysis between young and  
236 old cells (Table S1)<sup>35</sup>.

237 Cell-to-cell correlation analyses were performed using the top 500 most variable genes  
238 within each individual and using Spearman's correlation as the measure of similarity between  
239 cells (Fig. 1D). Distance to the median of the top 500 most variable genes within each  
240 individual was computed for Fig. 1E, similar results are observed when restricting the analysis  
241 to genes that are expressed in all the individuals (average normalized read count of at least 10)  
242 and different numbers of genes (Fig. S9).

243 An average young reference transcriptome was computed by calculating the mean of  
244 log transformed expression values for each gene across cells from young individuals. We then  
245 performed Spearman's correlation analyses to assess the similarity between each cell from old  
246 samples and the young transcriptome. Spearman's correlation analyses were then also used to  
247 find gene expression patterns associated with this genome-wide similarity score. Genes  
248 expressed in fewer than five cells were excluded from the analysis. The top 200 correlated and  
249 anticorrelated genes (Table S4) were used for GO enrichment analysis<sup>36</sup>.

250

## 251 DNA-methylome

252 We discarded cells that had less than 1 million paired-end alignments or less than 500,000 CpG  
253 sites covered (Fig. S1). To avoid biases that might occur due to different sequencing depths or  
254 number of cells between individuals, we down-sampled the data to 1 million reads for each cell  
255 and randomly selected 35 cells from each individual (2 young and 2 old). ChIP-seq datasets  
256 for H3K4me3, H3K27me3, H3K36me3 in satellite cells and H3K27ac in myoblast were  
257 obtained from existing studies<sup>23,29</sup>. Bowtie2 and MACS2 were used for mapping and peak  
258 calling respectively.

259

## 260 DNA methylation heterogeneity

261 We developed a heterogeneity score based on Hamming distances and Shannon entropy  
262 between cell pairs from the same sample. This value captures the properties we desire: i) ability  
263 to detect cell-to-cell stochastic heterogeneity ii) not affected by population substructure iii) not  
264 biased by missing values. Precisely, let  $r$  be a matrix with methylation values of cells for a  
265 particular gene, each row corresponding to a cell and each column corresponding to a CpG site,  
266 and  $w$  be the weight corresponding to the number of covered CpGs within each pairs of cells.  
267 For each pair of cells ( $c$ ), we then computed the Hamming distance ( $D$ ) and the Shannon  
268 entropy score of the pairs ( $S$ ) considering sites with coverage in both cells. Then weighted  
269 heterogeneity score of the regions is:

$$270 \quad H(r) = \frac{\sum_{c=1}^n w_c \times D_c}{\sum_{c=1}^n w_c} \times \frac{\sum_{c=1}^n w_c \times S_c}{\sum_{c=1}^n w_c}$$

271 Here  $D_c$  is the normalised Hamming distance of a given a pair of cells, which measures the  
272 number of bits that are different in two binary sets:

$$273 \quad D_c = \sum_{i=1}^k |x_i - x_j|$$

274  $S_c$  is the joint Shannon Entropy between a pair of cells which measures the complexity of the  
275 pattern:

$$276 \quad S_c = -\sum_{i=1}^k p_i \cdot \log_2(p_i)$$

277 Here  $p$  is the frequency of pairs of methylation values.

278 We validated our approach by applying the method in simulated data with increasing  
279 levels of methylation heterogeneity (Fig. S3). We also observed that our algorithm is highly  
280 robust to missing data (Fig. S3).

281 We applied this method across multiple genomic regions for each individual

282 independently and then computed the average of young and old samples. Pairwise comparisons  
283 with fewer than 4 CpG sites were not considered in the analysis. Furthermore, to avoid  
284 misinterpretations because of poor coverage depth we excluded regions with: i) less than  
285 20CpG sites, ii) less than an average of 2 CpG sites covered per cell, iii) less than 100 cell-to-  
286 cell pairwise comparisons. We also excluded regions with high coverage differences between  
287 ages (more than an average of 10 CpG sites or more than 200 cell-to-cell pairwise  
288 comparisons). A total of 63,823 genomic regions were used in the analysis (average window  
289 size= 2,267 bp).

290 Coverage-weighted cell methylation values were used to calculate the mean  
291 methylation levels of each region. A normalised measure of DNA methylation heterogeneity  
292 was calculated for each region (from young or old samples) by fitting the score of heterogeneity  
293 as a function of the mean methylation levels and then calculating the distance to a rolling  
294 median of 1,000 observations (Fig. 3F). Regions with less than 0.05 or more than 0.9 mean  
295 methylation levels were excluded from the analysis.

296 Differences between young and old DNA methylation heterogeneity values were Z-score  
297 normalised using a sliding window of 100 observations ordered by the mean value of young  
298 and old (Fig. S10 and Table S5). Same approach was used to calculate differences between  
299 young and old transcriptional heterogeneity (mean distance to the median) (Fig S9 and Table  
300 S5).

301

#### 302 Data availability

303 Sequencing data have been deposited in GEO with the accession: GSE121364

304

#### 305 Software

306 Custom software is available upon request.

307

308 **References**

- 309 1. López-Otín, C., Blasco, M. A., Partridge, L., Serrano, M. & Kroemer, G. The  
310 Hallmarks of Aging. *Cell* **153**, 1194–1217 (2013).
- 311 2. Bahar, R. *et al.* Increased cell-to-cell variation in gene expression in ageing mouse  
312 heart. *Nature* **441**, 1011–1014 (2006).
- 313 3. Martinez-Jimenez, C. P. *et al.* Aging increases cell-to-cell transcriptional variability  
314 upon immune stimulation. *Science*. **355**, 1433–1436 (2017).
- 315 4. Enge, M. *et al.* Single-cell analysis of human pancreas reveals transcriptional  
316 signatures of aging and somatic mutation patterns. *Cell* **171**, 321–330 (2017).
- 317 5. Cheung, P. *et al.* Single-cell chromatin modification profiling reveals increased  
318 epigenetic variations with aging. *Cell* **173**, 1385–1397 (2018).
- 319 6. Benayoun, B. A., Pollina, E. A. & Brunet, A. Epigenetic regulation of ageing: Linking  
320 environmental inputs to genomic stability. *Nat. Rev. Mol. Cell Biol.* **16**, 593–610  
321 (2015).
- 322 7. Horvath, S. & Raj, K. DNA methylation-based biomarkers and the epigenetic clock  
323 theory of ageing. *Nat. Rev. Genet.* **19**, 371–384 (2018).
- 324 8. Veitia, R. A., Govindaraju, D. R., Bottani, S. & Birchler, J. A. Aging: somatic  
325 mutations, epigenetic drift and gene dosage imbalance. *Trends Cell Biol.* **27**, 299–310  
326 (2017).
- 327 9. Gravina, S., Dong, X., Yu, B. & Vijg, J. Single-cell genome-wide bisulfite sequencing  
328 uncovers extensive heterogeneity in the mouse liver methylome. *Genome Biol.* **17**,  
329 150–158 (2016).
- 330 10. Angermueller, C. *et al.* Parallel single-cell sequencing links transcriptional and  
331 epigenetic heterogeneity. *Nat. Methods* **13**, 229–232 (2016).

- 332 11. Kelsey, G., Stegle, O. & Reik, W. Single-cell epigenomics: Recording the past and  
333 predicting the future. *Science*. **358**, 69–75 (2017).
- 334 12. Oh, J., Lee, Y. D. & Wagers, A. J. Stem cell aging: mechanisms, regulators and  
335 therapeutic opportunities. *Nat. Med.* **20**, 870–880 (2014).
- 336 13. Snippert, H. J. *et al.* Intestinal crypt homeostasis results from neutral competition  
337 between symmetrically dividing Lgr5 stem cells. *Cell* **143**, 134–144 (2010).
- 338 14. Nguyen, P. D. *et al.* Muscle stem cells undergo extensive clonal drift during tissue  
339 growth via Meox1-mediated induction of G2 cell-cycle arrest. *Cell Stem Cell* **21**, 107–  
340 119 (2017).
- 341 15. Klein, A. M., Nakagawa, T., Ichikawa, R., Yoshida, S. & Simons, B. D. Mouse germ  
342 line stem cells undergo rapid and stochastic turnover. *Cell Stem Cell* **7**, 214–224  
343 (2010).
- 344 16. Brack, A. S. & Rando, T. A. Tissue-specific stem cells: lessons from the skeletal  
345 muscle satellite cell. *Cell Stem Cell* **10**, 504–514 (2012).
- 346 17. Brack, A. S. & Muñoz-Cánoves, P. The ins and outs of muscle stem cell aging. *Skelet.*  
347 *Muscle* **6**, 1–9 (2016).
- 348 18. Tierney, M. T., Stec, M. J., Rulands, S., Simons, B. D. & Sacco, A. Muscle stem cells  
349 exhibit distinct clonal dynamics in response to tissue repair and homeostatic aging.  
350 *Cell Stem Cell* **22**, 119–127 (2018).
- 351 19. Rocheteau, P., Gayraud-Morel, B., Siegl-Cachedenier, I., Blasco, M. A. & Tajbakhsh,  
352 S. A subpopulation of adult skeletal muscle stem cells retains all template DNA  
353 strands after cell division. *Cell* **148**, 112–125 (2012).
- 354 20. Chakkalakal, J. V, Jones, K. M., Basson, M. A. & Brack, A. S. The aged niche disrupts  
355 muscle stem cell quiescence. *Nature* **490**, 355–360 (2012).
- 356 21. Sambasivan, R. *et al.* Distinct regulatory cascades govern extraocular and pharyngeal



- 357 arch muscle progenitor cell fates. *Dev. Cell* **16**, 810–821 (2009).
- 358 22. Bigot, A. *et al.* Age-associated methylation suppresses SPRY1, leading to a failure of  
359 re-quiescence and loss of the reserve stem cell pool in elderly muscle. *Cell Rep.* **13**,  
360 1172–1182 (2015).
- 361 23. Machado, L. *et al.* In situ fixation redefines quiescence and early activation of skeletal  
362 muscle stem cells. *Cell Rep.* **21**, 1982–1993 (2017).
- 363 24. Brennecke, P. *et al.* Accounting for technical noise in single-cell RNA-seq  
364 experiments. *Nat. Methods* **10**, 1093–1095 (2013).
- 365 25. Rozo, M., Li, L. & Fan, C. M. Targeting  $\beta$ 1-integrin signaling enhances regeneration  
366 in aged and dystrophic muscle in mice. *Nat. Med.* **22**, 889–896 (2016).
- 367 26. Goel, A. J., Rieder, M. K., Arnold, H. H., Radice, G. L. & Krauss, R. S. Niche  
368 cadherins control the quiescence-to-activation transition in muscle stem cells. *Cell*  
369 *Rep.* **21**, 2236–2250 (2017).
- 370 27. Brink, S. C. van den *et al.* Single-cell sequencing reveals dissociation-induced gene  
371 expression in tissue subpopulations. *Nat. Methods* **14**, 935–936 (2017).
- 372 28. Davegårdh, C. *et al.* Abnormal epigenetic changes during differentiation of human  
373 skeletal muscle stem cells from obese subjects. *BMC Med.* **15**, 39–66 (2017).
- 374 29. Liu, L. *et al.* Chromatin modifications as determinants of muscle stem cell quiescence  
375 and chronological aging. *Cell Rep.* **4**, 189–204 (2013).
- 376 30. Macaulay, I. C. *et al.* G&T-seq: Parallel sequencing of single-cell genomes and  
377 transcriptomes. *Nat. Methods* **12**, 519–522 (2015).
- 378 31. Picelli, S. *et al.* Full-length RNA-seq from single cells using Smart-seq2. *Nat. Protoc.*  
379 **9**, 171–181 (2014).
- 380 32. Clark, S. J. *et al.* Genome-wide base-resolution mapping of DNA methylation in single  
381 cells using single-cell bisulfite sequencing (scBS-seq). *Nat. Protoc.* **12**, 534–547

- 382 (2017).
- 383 33. Kim, D., Langmead, B. & Salzberg, S. L. HISAT: A fast spliced aligner with low  
384 memory requirements. *Nat. Methods* **12**, 357–360 (2015).
- 385 34. Krueger, F. & Andrews, S. R. Bismark: A flexible aligner and methylation caller for  
386 Bisulfite-Seq applications. *Bioinformatics* **27**, 1571–1572 (2011).
- 387 35. Kharchenko, P. V., Silberstein, L. & Scadden, D. T. Bayesian approach to single-cell  
388 differential expression analysis. *Nat. Methods* **11**, 740–742 (2014).
- 389 36. Eden, E., Navon, R., Steinfeld, I., Lipson, D. & Yakhini, Z. GOrilla: A tool for  
390 discovery and visualization of enriched GO terms in ranked gene lists. *BMC*  
391 *Bioinformatics* **10**, 48–55 (2009).

392

393 **Acknowledgments:** We would like to thank the Flow Cytometry Platform of the Center for  
394 Technological Resources and Research (Institut Pasteur) and the Wellcome Trust Sanger  
395 Institute sequencing facility for assistance with Illumina sequencing. This project was  
396 supported by grants from Institut Pasteur, Agence Nationale de la Recherche (Laboratoire  
397 d'Excellence Revive, Investissement d'Avenir; ANR-10-LABX-73), Association Française  
398 contre les Myopathies (21857), CNRS, the European Research Council (Advanced Research  
399 Grant 332893), and the Biotechnology and Biological Sciences Research Council (BBSRC,  
400 CBBS/E/B/000C0425).

401

402 **Author contributions:** I.H.H., B.E., T.S., S.T. and W.R. proposed the concept and designed  
403 the experiments. B.E and P.H.C. performed FACS; T.S. and S.C. performed library preparation  
404 and sequencing. I.H.H. developed the analysis methodologies and analysed the experiments  
405 with advice from SA. I.H.H., B.E., S.T. and W.R. wrote the paper. All authors read and agreed  
406 on the manuscript.

407

408 **Competing interests:** W.R. is a consultant and shareholder of Cambridge Epigenetix. T.S. is

409 CEO of Chronomics. All other authors declare no competing financial interests.

410

411 **Materials & Correspondence:** Correspondence and material requests should be addressed to

412 [shahragim.tajbakhsh@pasteur.fr](mailto:shahragim.tajbakhsh@pasteur.fr) and [wolf.reik@babraham.ac.uk](mailto:wolf.reik@babraham.ac.uk).

413

Figures:

Fig. 1

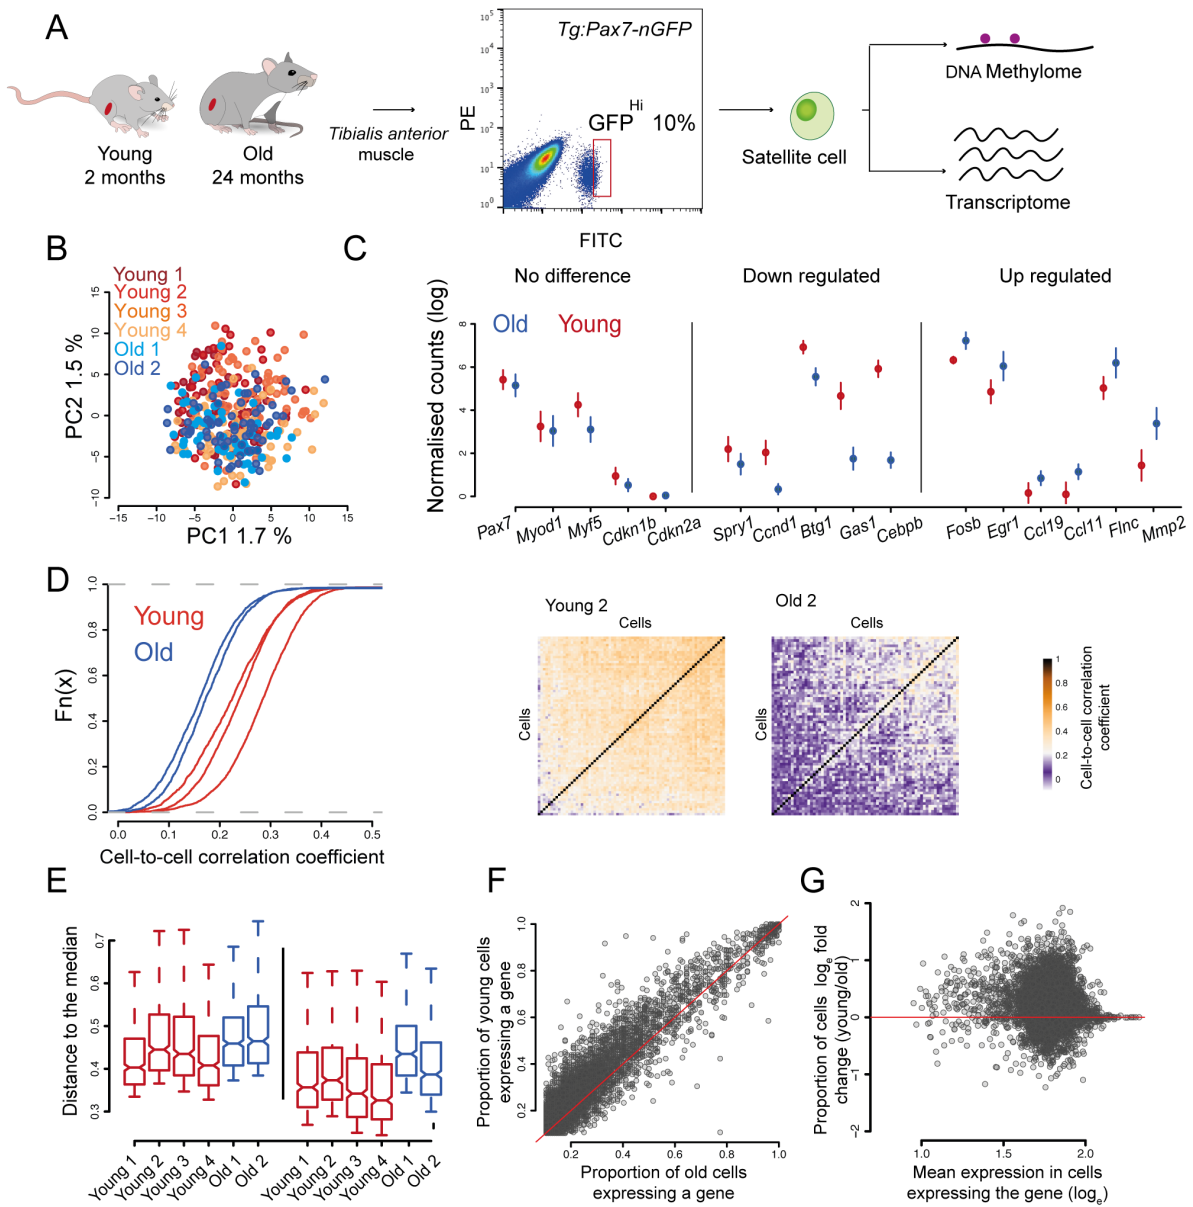

414

- 415 **Fig. 1. Aged satellite cells have increased cell-to-cell transcriptional variability**
- 416 (A) Experimental scheme. Single cells were isolated from *Tg:Pax7-nGFP* young and old mice
- 417 and subjected to parallel single-cell methylation and RNA sequencing.
- 418 (B) PCA of a total of 377 cells from young (n=4) and old (n=2) individuals.
- 419 (C) Selected markers and differentially expressed genes between young and old cells (mean  $\pm$
- 420 standard error).
- 421 (D) Cumulative distribution of cell-to-cell Spearman correlation values per individual (left)
- 422 showing that transcriptional heterogeneity dramatically increases with age. Heatmap showing
- 423 cell-to-cell Spearman correlation values from a young and an old mouse (right).
- 424 (E) Distance to the median of the top 500 most variable genes among all genes (left) and of the
- 425 top 500 most variable genes among the 5,127 common genes expressed in the six individuals
- 426 (right).
- 427 (F) Frequency of gene expression in young and old cells.
- 428 (G) Independence between frequency of gene expression differences and gene expression level.

Fig. 2

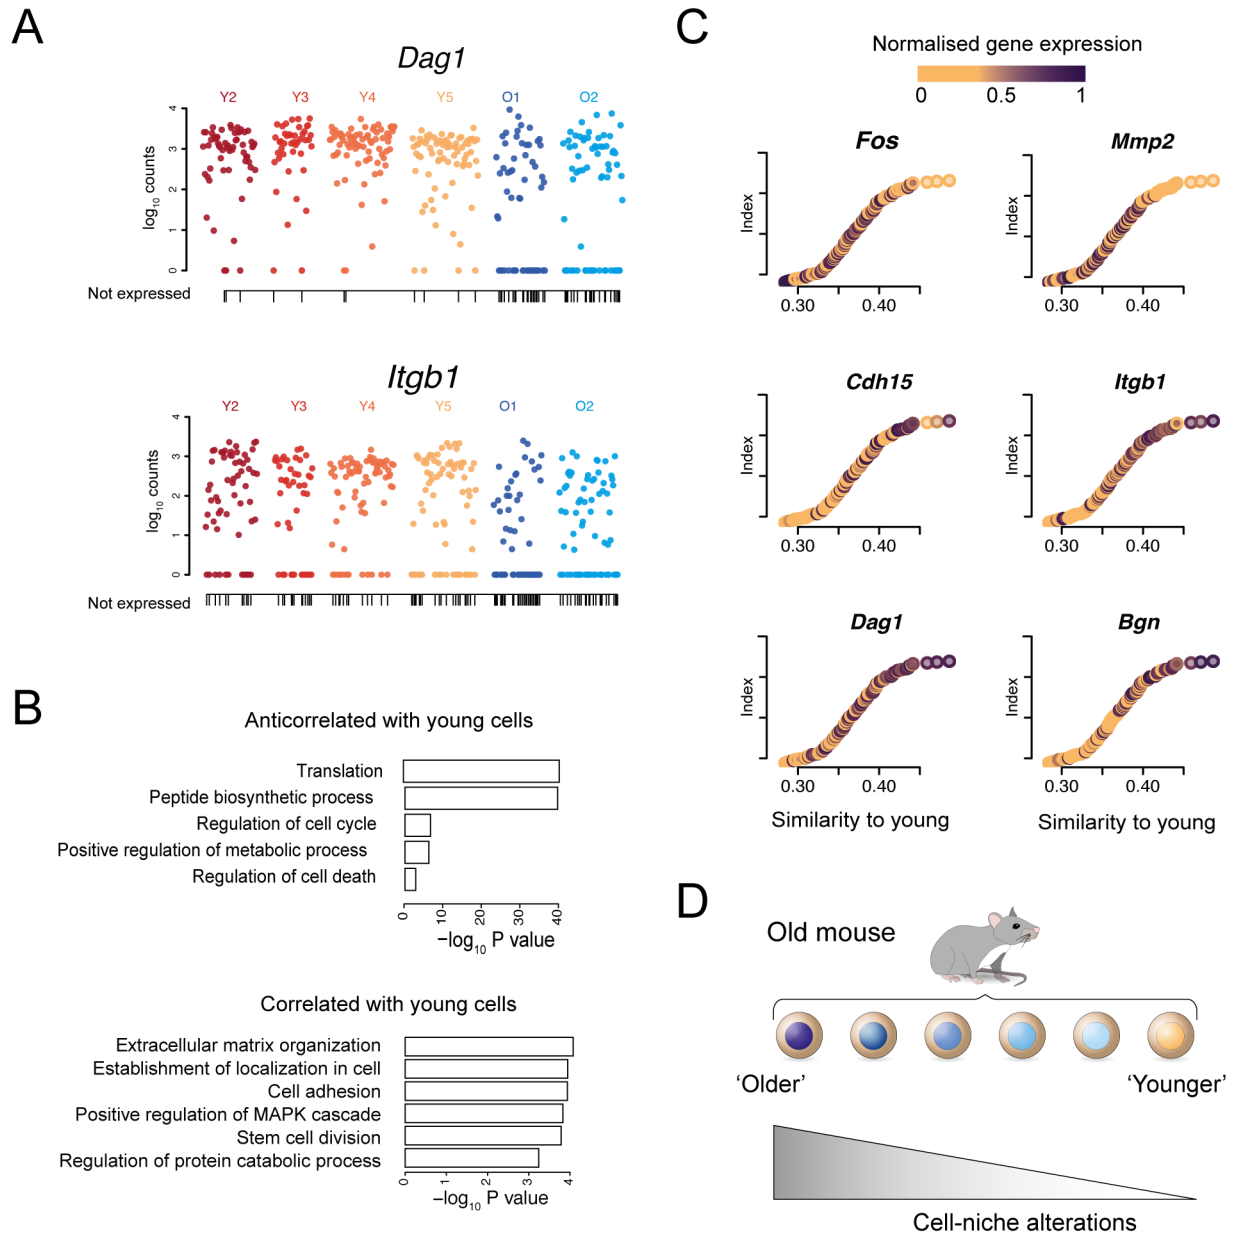

430 **Fig. 2. Variability within aged satellite cells and cell-niche interactions**

431 (A) *Dag1* and *Itgb1* expression in young and old cells. Each dot represents a cell. Vertical lines

432 on the x-axis indicate cells that do not express the gene.

433 (B) P-values of the GO terms associated with the top 200 anticorrelated (top) and correlated

434 (bottom) genes with the similarity score to young cells.

435 (C) Similarity between old and young cells. Each dot represents an old cell; on the x-axis cells

436 are ordered according to their similarity (Spearman correlation coefficient) to young cells

437 (young mean expression). Colours indicate the normalized levels of expression of selected

438 genes correlated with the x-axis.

439 (D) Old cells diverging from young cells are likely to have impaired cell-niche interactions.

Fig. 3

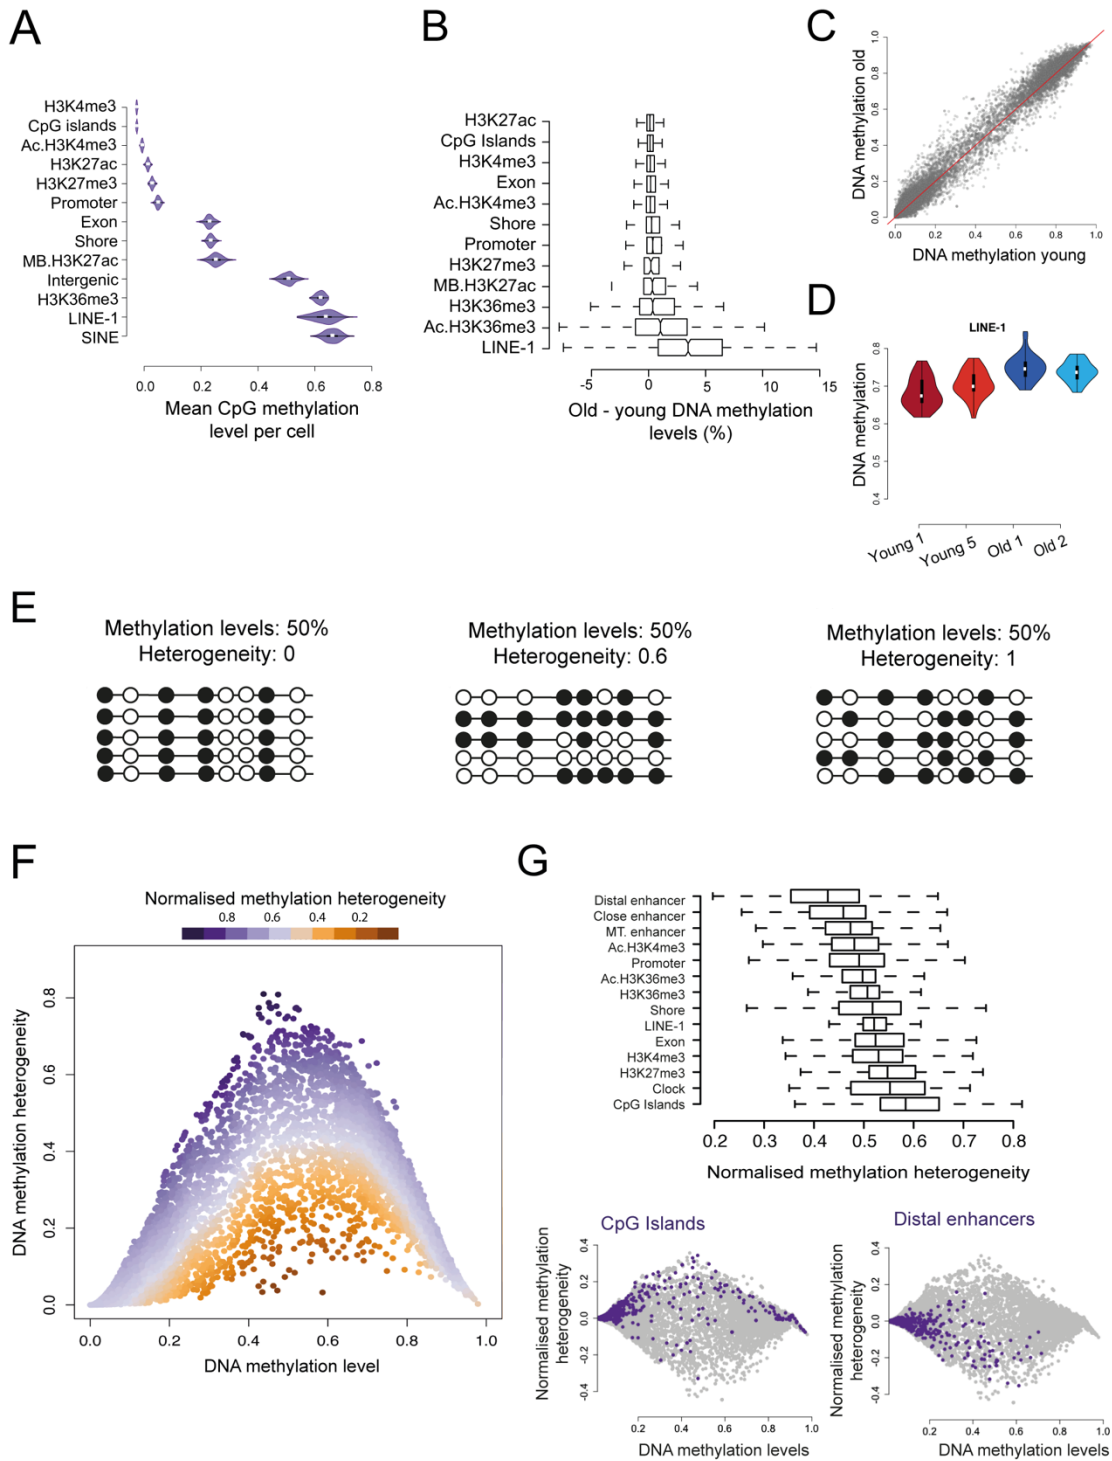



441 **Fig. 3. Changes in methylation levels and methylation heterogeneity**

442 (A) Levels of DNA methylation per cell across different genomic regions (Chip-seq data from

443 2-months-old mice <sup>23</sup>, Ac: activated satellite cells <sup>23</sup>, MB: myoblast <sup>29</sup>).

444 (B) Mean methylation difference between old and young cells across different genomic

445 elements.

446 (C) Genome-wide mean methylation values in old and young cells. Each dot represents a

447 genomic region.

448 (D) Levels of DNA methylation per cell and individual across Line L1 elements.

449 (E) Examples of different distributions of DNA methylation heterogeneity at loci with similar

450 average methylation. Empty circles represent unmethylated CpG sites and filled circles

451 methylated CpG sites.

452 (F) DNA methylation levels and DNA methylation heterogeneity. Each dot represents a

453 genomic region from young or old cells. Colour scale represents the methylation-level

454 normalised measure of DNA methylation heterogeneity.

455 (G) Boxplot showing the normalised DNA methylation heterogeneity across different genomic

456 elements in young cells (top). Normalised methylation heterogeneity and methylation levels

457 across all the different genomic elements (grey) and across CpG Islands (purple) or enhancer

458 regions (purple) in young cells (bottom).

Fig. 4

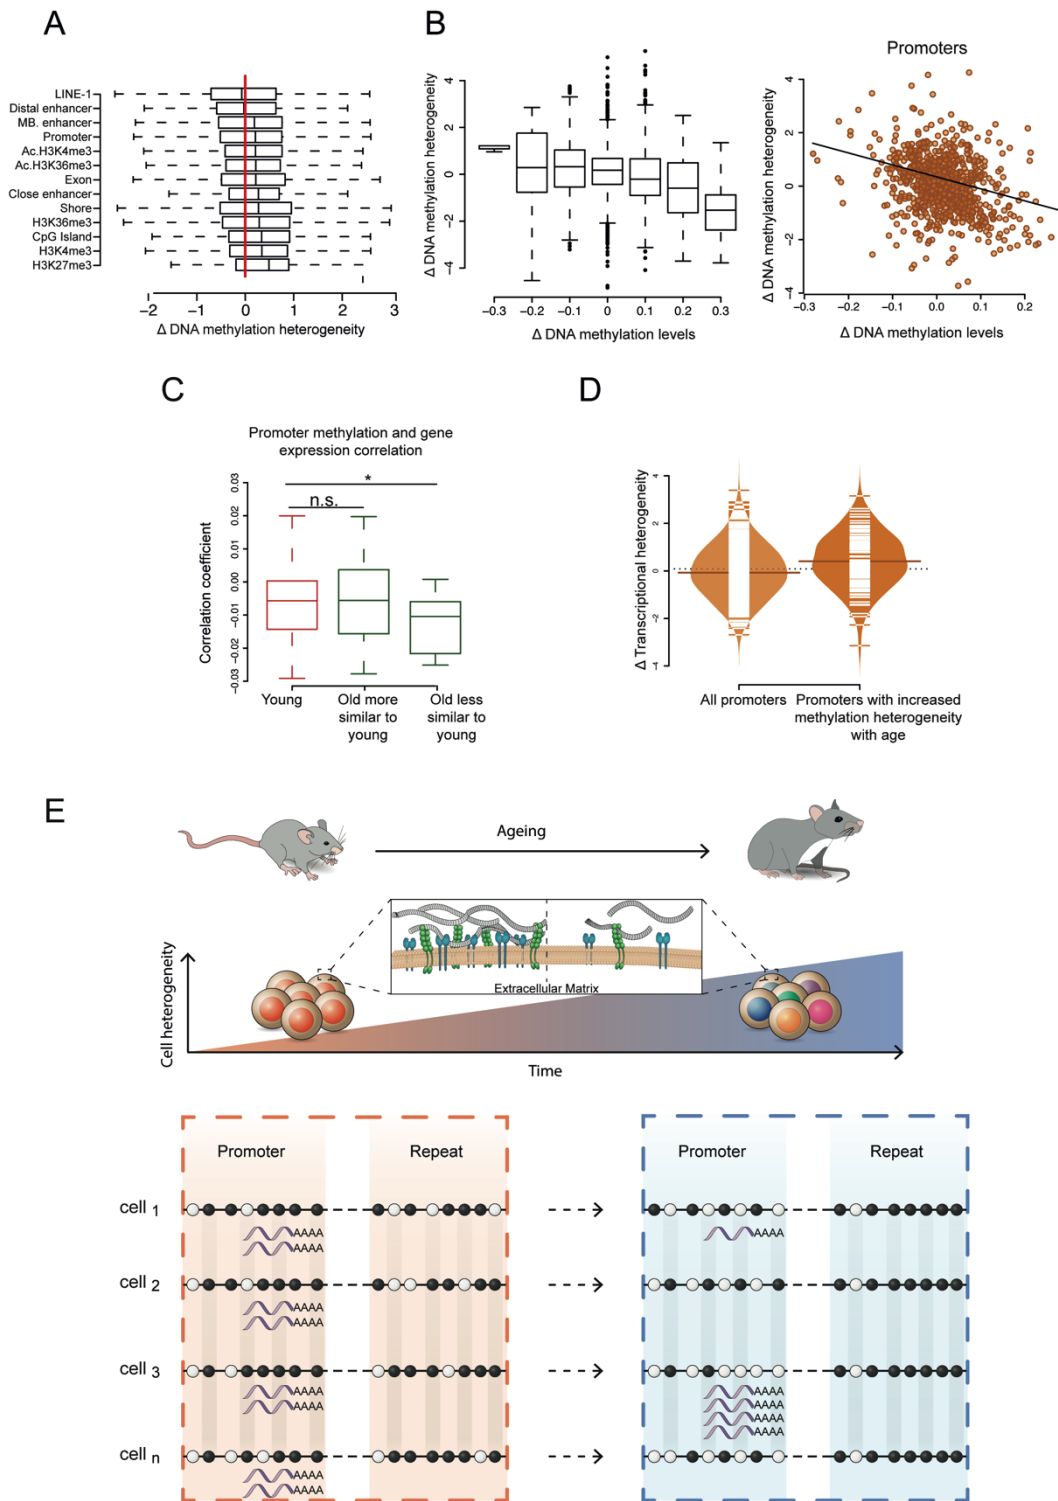

460 **Fig. 4. Changes in cell-to-cell methylation heterogeneity during ageing**

461 (A) Normalised methylation heterogeneity changes with age ( $\Delta$  methylation heterogeneity:  
462 old–young) across different genomic features (Ac: activated satellite cells <sup>23</sup>, MB: myoblast <sup>29</sup>).

463 (B) Genome-wide normalised methylation heterogeneity difference with ages ( $\Delta$  methylation  
464 heterogeneity: old–young) binned by 0.1 methylation level differences (left). Changes in  
465 promoter methylation heterogeneity (y-axis) and methylation levels (x-axis) with age (right).

466 (C) Distribution of Pearson’s correlation coefficients between promoter DNA methylation and  
467 gene expression (one association test per cell, number of cells: young = 64, old more similar  
468 to young = 30, old less similar to young = 20, \*  $P < 0.05$ ).

469 (D) Increase of transcriptional heterogeneity with age across all promoters (n=394) and  
470 promoters with increased DNA methylation heterogeneity ( $\Delta$  methylation heterogeneity  $> 0.3$ ,  
471 n=113) ( $P < 0.001$ ).

472 (E) Global increase of transcriptional cell-to-cell variability with age with enhanced  
473 heterogeneity in the multiple extracellular matrix related genes (top). Relationship between  
474 transcriptional and DNA methylation heterogeneity in aged satellite cells (bottom). Empty  
475 circles represent unmethylated CpG sites and filled circles methylated CpG sites. Repeat  
476 elements become more homogeneous with age by increasing their methylation levels in a  
477 coordinated manner. In contrast, promoter regions become more heterogeneous by randomly  
478 loosening DNA methylation and this is coupled with an increase of transcriptional variability of  
479 the genes they drive.

480 **Extended data:**

Fig. S1

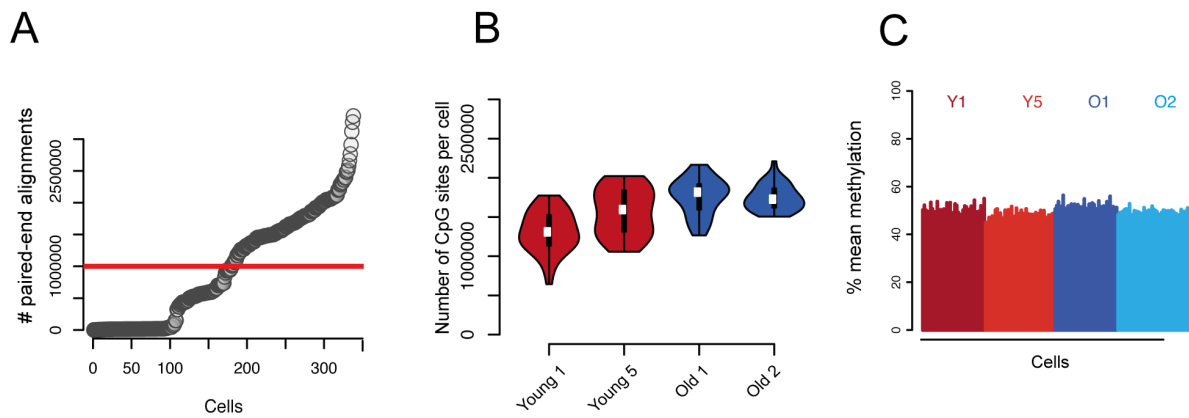

481

482 **Fig. S1. Quality control of single-cell DNA methylation data.**

483 (A) Number of pair-end alignments per cell. Cells below the threshold were excluded from the  
484 study.

485 (B) Number of CpG sites per cell and individual.

486 (C) Mean methylation per cell showing no global differences between ages.

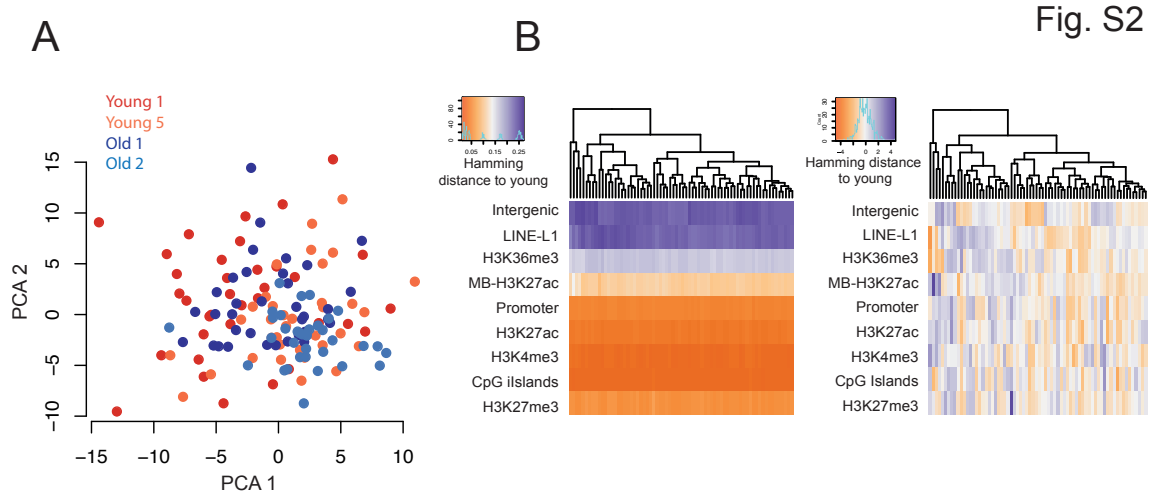

Fig. S2

487

488

**Fig. S2. Cell clustering based on DNA methylation data**

489

(A) PCA on gene body methylation showing no clear differences between ages.

490

(B) Heatmap showing Hamming distances between the average methylation from young cells

491

and individual old cells (columns) across different genomic context (rows) (left). Same

492

measure normalised by genomic context (right) showing no cellular substructure.

Fig. S3

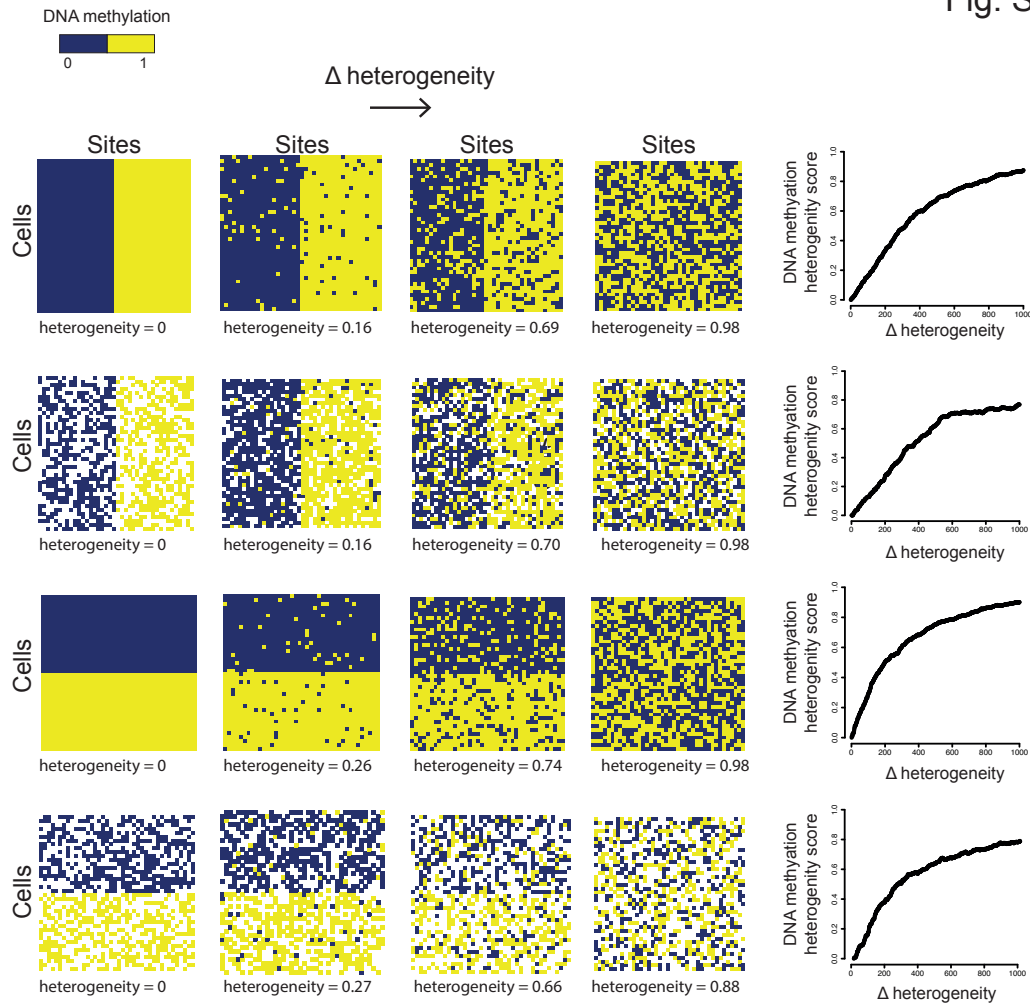

493

494

**Fig. S3. DNA methylation heterogeneity on simulated data.**

495

Four cases with different population substructure and missing values tested with simulated data

496

of increasing heterogeneity. Missing values are represented in white.

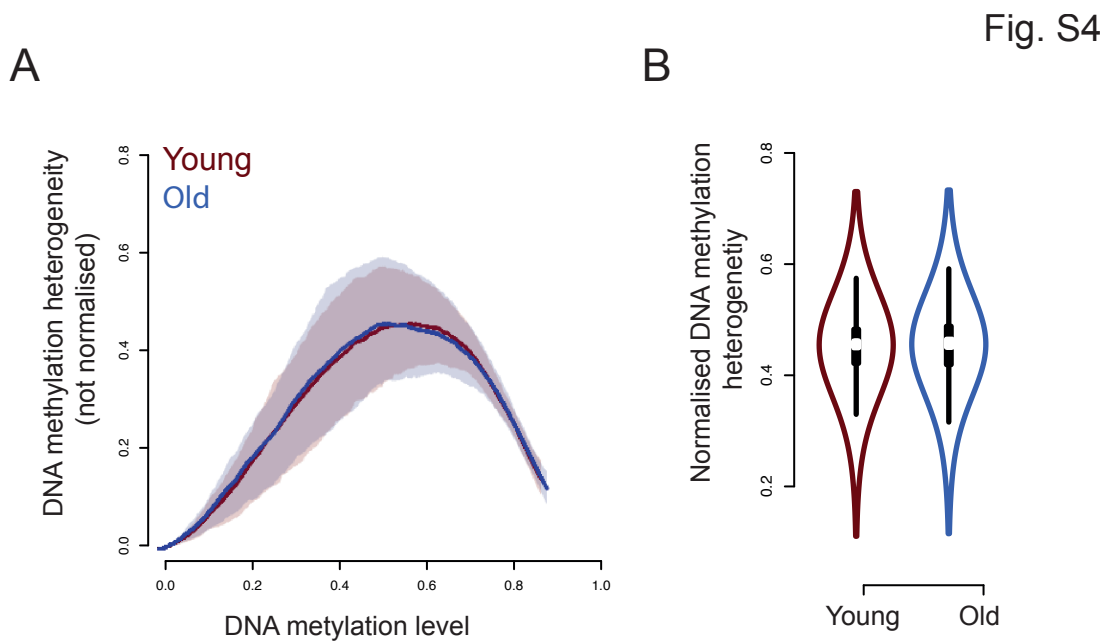

497

498 **Fig. S4. Global levels of DNA methylation heterogeneity between ages.**

499 (A) DNA methylation levels and methylation heterogeneity in young and old cells.

500 (B) Normalised DNA methylation heterogeneity in young and old cells.

501

Fig. S5

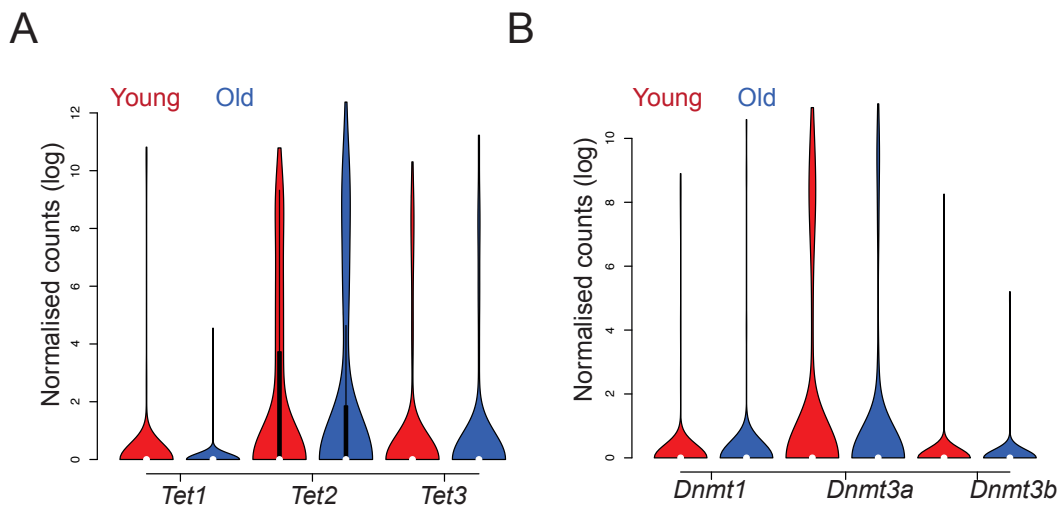

502

503 **Fig. S5. Expression levels of the DNA methylation enzymes.**

504 (A) Expression levels of the enzymes for active demethylation in young and old samples.

505 (B) Expression levels of the DNA methylation enzymes in young and old samples.



Fig. S6

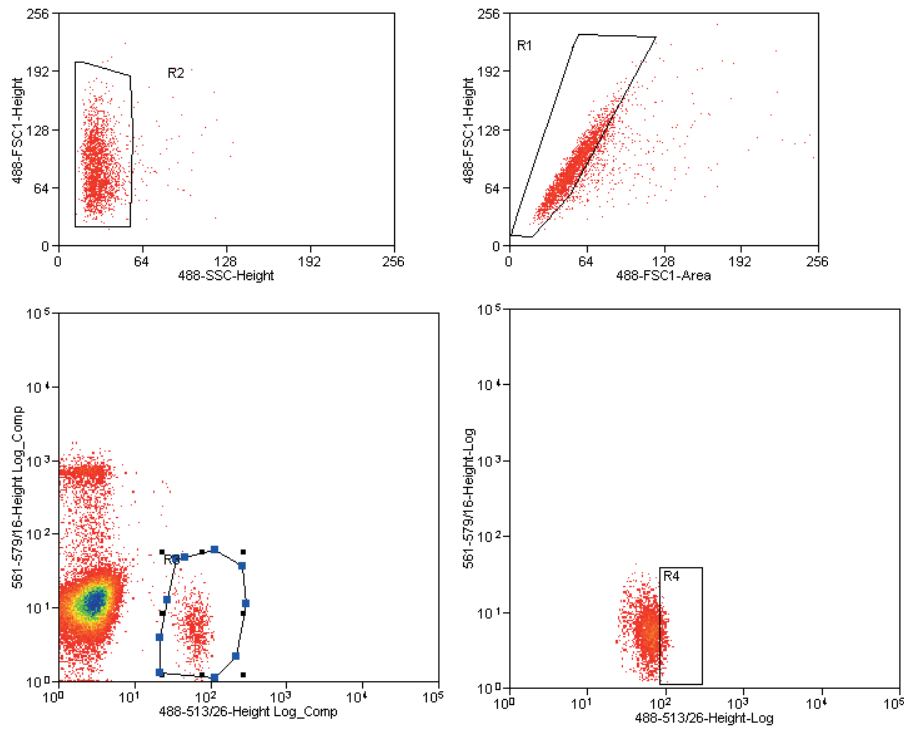

506

507

**Fig. S6. Isolation of single satellite cells by FACS.**

508

Satellite cells were isolated by FACS by gating first on size and granularity (R2 gate),

509

excluding doublets (R1 gate) and gating on the GFP<sup>+</sup>/PI<sup>-</sup> population (R3 gate). Pax7-nGFP<sup>Hi</sup>

510

cells (top 10% highest nGFP-expressing cells, R4 gate) were sorted as single cells.

Fig. S7

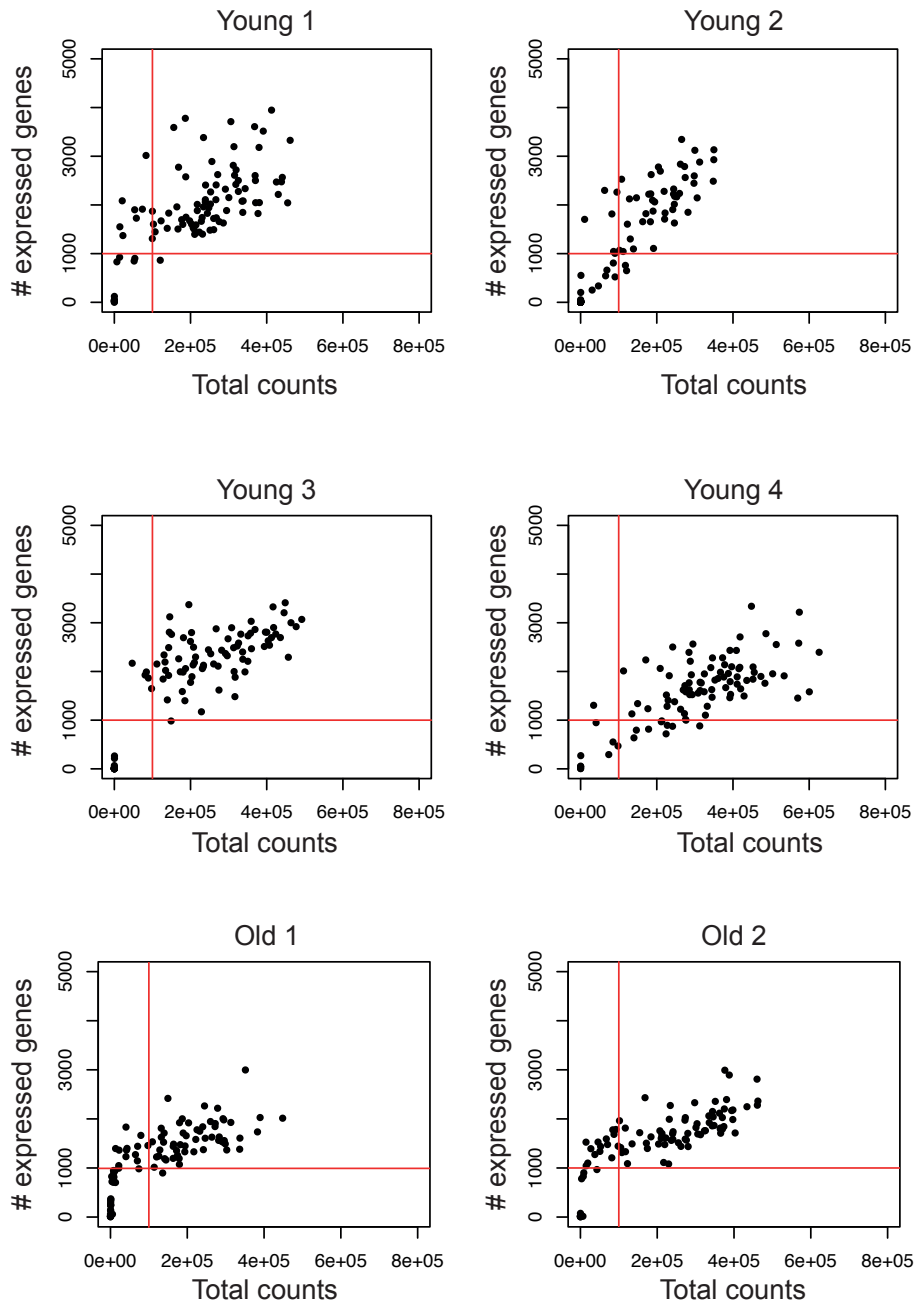

511

512 **Fig. S7. Quality control of single-cell RNA-seq data.**

513 Plot representing number of genes and total expression counts expressed in each cell per  
514 individual. Cells above highlighted threshold (1000 genes, 10<sup>5</sup> counts) were included in the

515 study.

Fig. S8

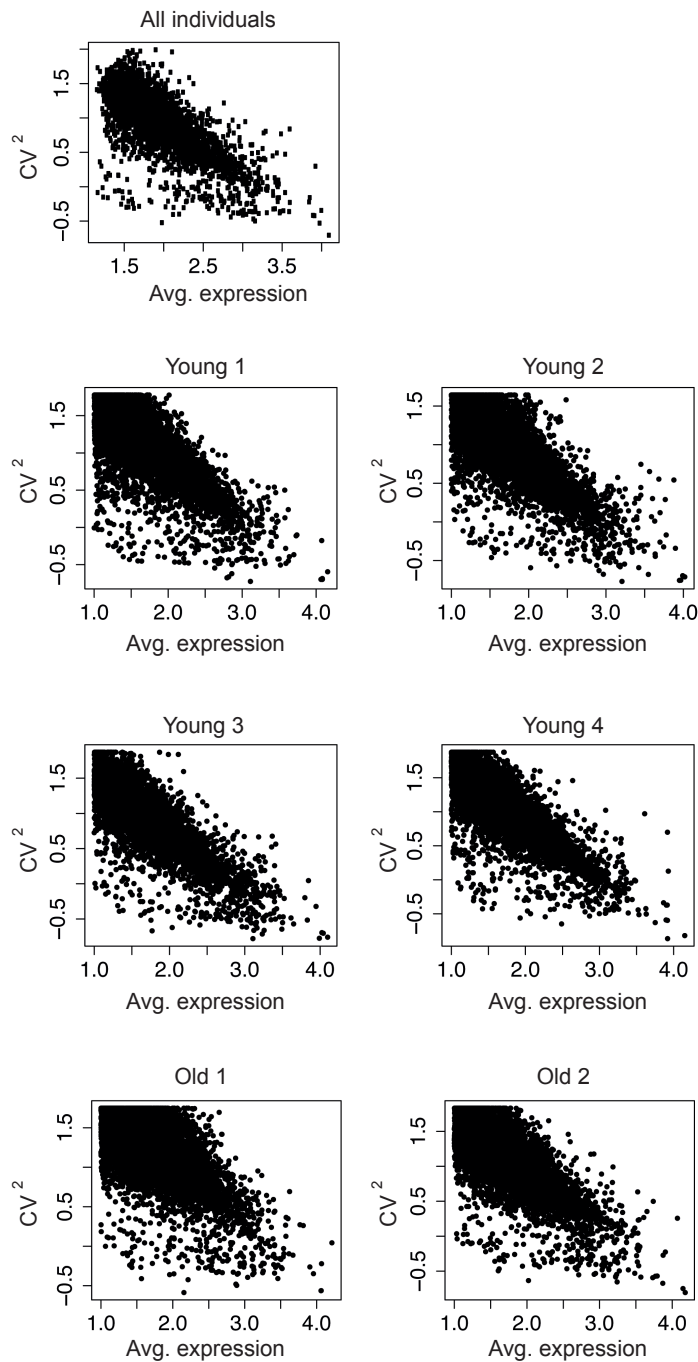

516

517 **Fig. S8. Transcriptional variability.**

518 Gene variability: squared coefficients of variation are plotted against the means of normalized

519 read counts for gene using data from all individuals (top) or each individual separately.

Fig. S9

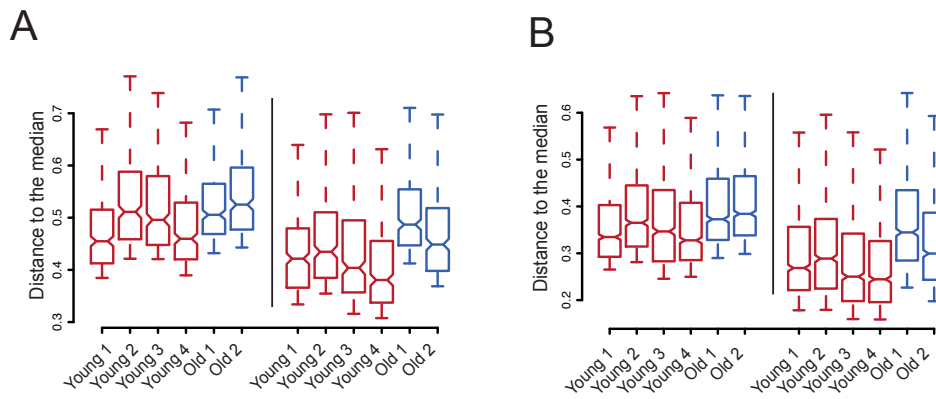

520

521 **Fig. S9. Transcriptional variability: distance to the median**

522 Distance to the median of the top 300 (A) and 1000 (B) most variable genes among all genes

523 (left) and among the 5,127 common genes expressed in the six individuals (right).

Fig. S10

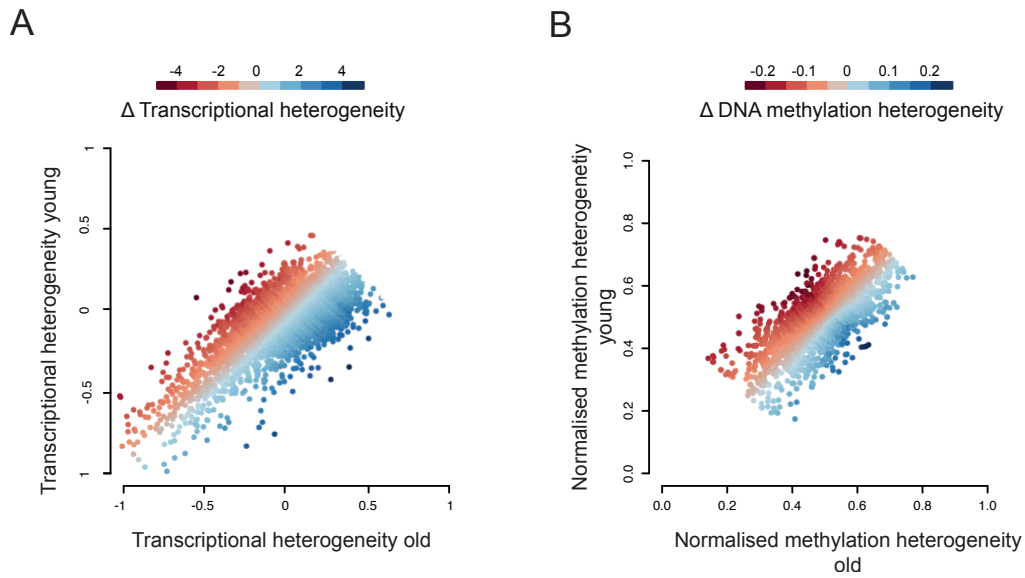

524

525

**Fig. S10. Changes in transcriptional and DNA methylation heterogeneity with age.**

526

(A) Differences in transcriptional heterogeneity measures where Z-score normalised using a sliding window of 100 observations (color code). Transcriptional heterogeneity represents the mean distance to the median for every gene from young (y-axis) and old (x-axis) individuals.

528

529

(B) Differences in DNA methylation heterogeneity measures where Z-score normalised using a sliding window of 100 observations (color code). DNA methylation heterogeneity represents the normalised measure of methylation heterogeneity from young (y-axis) and old (x-axis) individuals.

531

532

individuals.

533 **Supplementary tables:**

534 **Table S1. Differentially expressed genes between cells from young and old mice.**

535 **Table S2. scM&T quality control.**

| Sequencing label | Individual | RNA         |          | DNA         |          |
|------------------|------------|-------------|----------|-------------|----------|
|                  |            | Total cells | After QC | Total cells | After QC |
| Y2               | Young 1    | 96          | 0        | 78          | 35       |
| Y8               | Young 2    | 96          | 75       | 86          | 35       |
| Y5               | Young 3    | 96          | 44       | NA          | NA       |
| Y7               | Young 4    | 96          | 74       | 72          | 35       |
| Y4               | Young 5    | 96          | 60       | NA          | NA       |
| O1               | Old 1      | 96          | 56       | 80          | 35       |
| O5               | Old 2      | 96          | 68       | 90          | 35       |
| O8               | Old 3      | 96          | 5        | 8           | 0        |

536

537

538 **Table S3. Top 1000 most variable genes across the entire data set.**

539 **Table S4. Top 200 genes correlated and anticorrelated with the similarity score to the**  
540 **young reference transcriptome.**

541 **Table S5. Increase of transcriptional and methylation heterogeneity with age in**  
542 **promoter regions ( $\Delta$ : Old-young).**
